# Supplementary material for: Neutrophil and Monocyte Function in Patients with Chronic Hepatitis C Undergoing Antiviral Therapy with Regimens Containing Protease Inhibitors with and without Interferon
Source: PubMed Central journal article supplement (PMC5115763; doi:10.1371/journal.pone.0166631), 2016-11-18

# Supplementary Figure 1

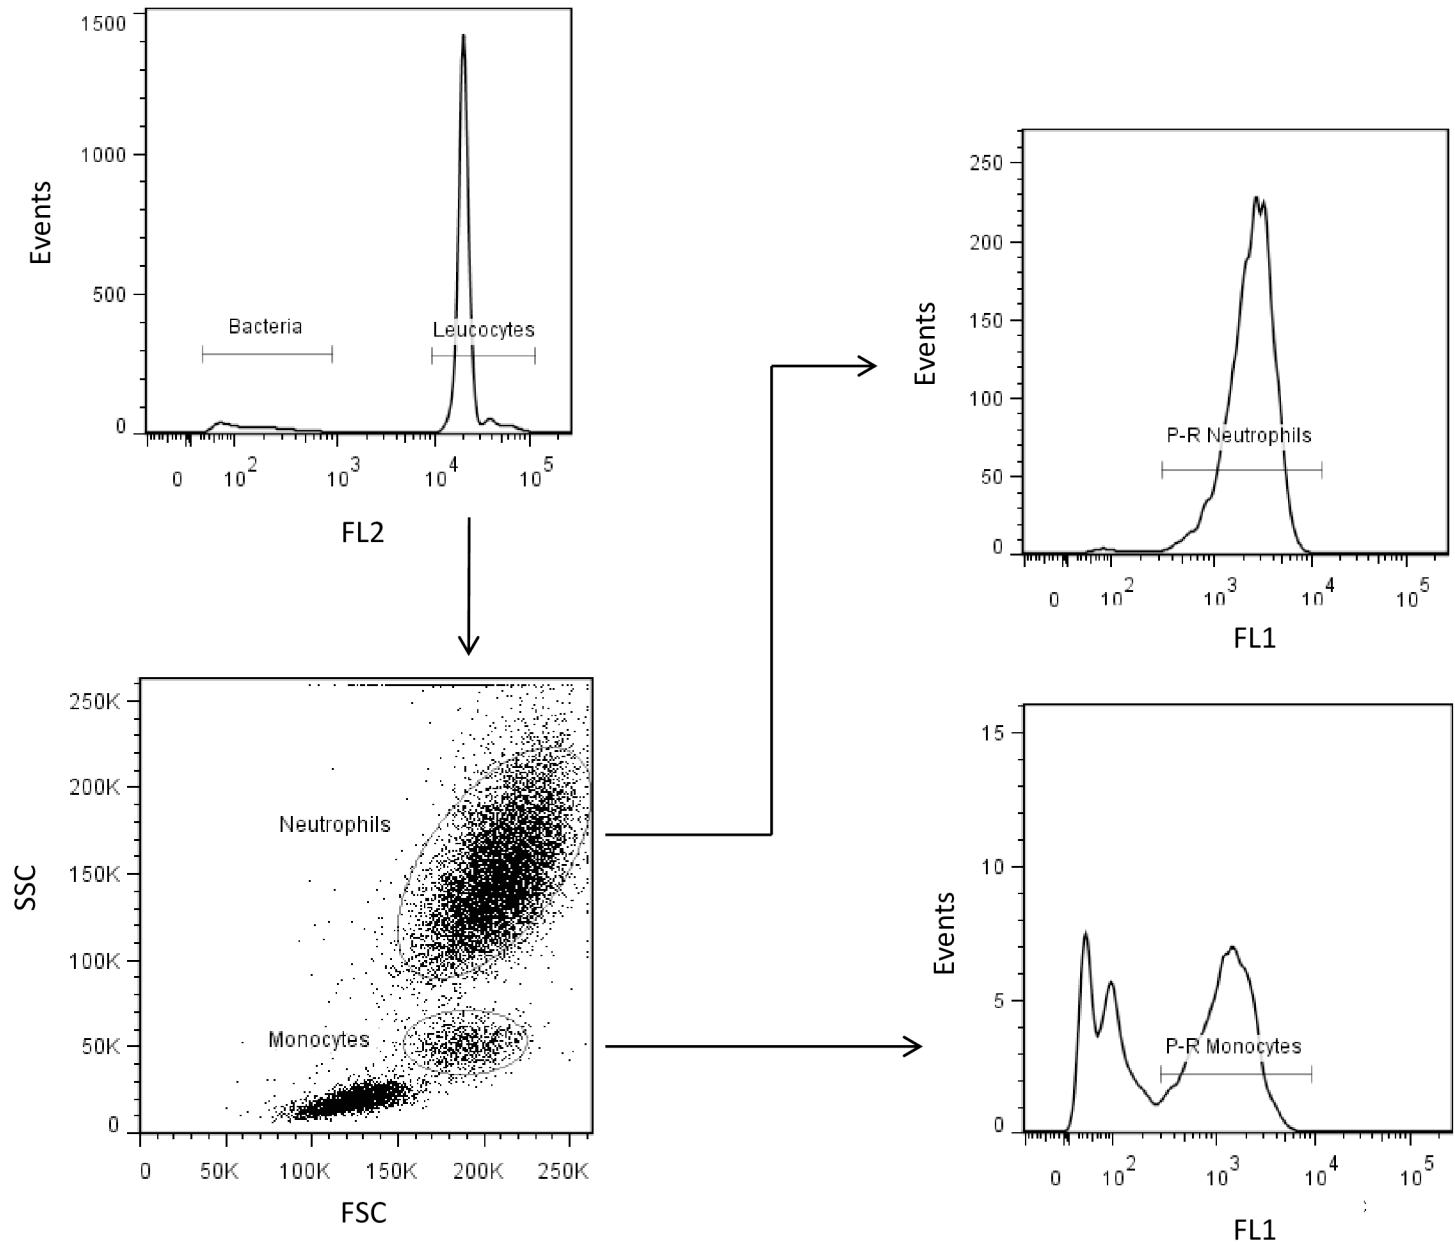

Supplement: pone.0166631.s001.pdf [file pone.0166631.s001.pdf]
